# Supplementary material for: Ligand-Enabled Pd-Catalyzed Enantioselective Synthesis of Quaternary Amino Acids and Glycolic Acids Derivatives
Source: Research Square preprint supplement (doi:10.21203/rs.3.rs-2678310/v1), 2023-03-23
Supplement: Supplementary file 1 [file 396ba0814181af7f35836073.docx]

| **Table 1. Optimization of the reaction conditions** |
| --- |

| Entrya | Ligand | Base | Solvent | Temperature | Yield (%)b | e.e. (%)c |
| --- | --- | --- | --- | --- | --- | --- |
| 1 | X5 | Rb2CO3 | toluene | 80 | 84 | 87 |
| 2 | X5 | K2CO3 | toluene | 80 | 81 | 86 |
| 3 | X5 | Na2CO3 | toluene | 80 | 21 | 85 |
| 4 | X5 | Cs2CO3 | toluene | 80 | trace |  |
| 5 | X5 | K3PO4 | toluene | 80 | 61 | 84 |
| 6 | X5 | Rb2CO3 | CH3CN | 80 | NR |  |
| 7 | X5 | Rb2CO3 | THF | 80 | trace |  |
| 8 | X5 | Rb2CO3 | 1,4-dioxane | 80 | trace |  |
| 9 | X5 | Rb2CO3 | DCE | 80 | 17 | 87 |
| 10d | X5 | Rb2CO3 | toluene | 40 | 80 | 91 |
| 11 | X5 | Rb2CO3 | toluene | 40 | 91 | 87 |

*a*Reaction conditions: The reaction was performed using 0.1 mmol of **1a** (0.1 M), 0.15 mmol of **4a** (0.1 M), Pd(OAc)2 (10 mol%), **L9** (12 mol%) and Rb2CO3 (2 equiv) in solvent (1 mL) at 40 °C for 24 h. *b*Yield was determined using 1,1,2,2-tetrachloroethane as the internal standard. *c*Determined by HPLC using a chiral stationary phase. *d*48 h instead of 24 h. NR = no reaction.

| **Table 2. Optimization of the reaction conditions**a,b,c |
| --- |

*a*Reaction conditions: The reaction was performed using 0.1 mmol of **1a** (0.1 M), 0.15 mmol of **4a** (0.1 M), Pd(OAc)2 (10 mol%), **L9** (12 mol%) and Rb2CO3 (2 equiv) in solvent (1 mL) at 40 °C for 24 h. *b*Yield was determined using 1,1,2,2-tetrachloroethane as the internal standard. *c*Determined by HPLC using a chiral stationary phase. *d*methylene instead of toluene.
